# Supplementary material for: Cost-Effective Protein Production in CHO Cells Following Polyethylenimine-Mediated Gene Delivery Showcased by the Production and Crystallization of Antibody Fabs
Source: MDPI journal article supplement (doi:10.3390/antib12030051), 2023-08-04
Supplement: s1 [file s1]

**Supplementary Table S2** Crystallization conditions

|                                                                  | DC11Fab                               | complex I<br>(MN423Fab + dGAE)        | complex II<br>(DC11Fab + DC25Fab + dGAE)                                 |
|------------------------------------------------------------------|---------------------------------------|---------------------------------------|--------------------------------------------------------------------------|
| Method                                                           | Vapor diffusion                       | Vapor diffusion                       | Vapor diffusion                                                          |
| Plate type                                                       | MRC 2-well                            | EasyXtal                              | MRC 2-well                                                               |
| Temperature (K)                                                  | 295 K                                 | 295 K                                 | 295 K                                                                    |
| Protein concentration                                            | 8 mg/ml                               | 4 mg/ml                               | 5 mg/ml                                                                  |
| Buffer composition of protein solution                           | 10 mM Tris-HCl, pH 7.2, 50 mM NaCl    | 10 mM Tris-HCl, pH 7.2, 50 mM NaCl    | 10 mM Tris-HCl, pH 7.2, 50 mM NaCl                                       |
| Composition of reservoir solution                                | 0.1 M MIB pH 6.0, 25 % (w/v) PEG 1500 | 0.1 M MIB pH 8.0, 25 % (w/v) PEG 1500 | 0.2 M ammonium sulfate, 0.1 M sodium acetate pH 5.6, 25 % (w/v) PEG 4000 |
| Volume and ratio of drop                                         | 0.5 µl + 0.5 µl (1:1)                 | 0.6 µl + 0.6 µl (1:1)                 | 0.2 µl + 0.2 µl (1:1)                                                    |
| Volume of reservoir                                              | 80 µl                                 | 200 µl                                | 80 µl                                                                    |
| MIB – malonic acid : imidazole : boric acid in 2:3:3 molar ratio |                                       |                                       |                                                                          |

**Supplementary Table S3** Data collection and processing

Values for the outer shell are given in parentheses.

|                                                            | DC11Fab                | complex I<br>(MN423Fab + dGAE) | complex II<br>(DC11Fab + DC25Fab + dGAE)                  |
|------------------------------------------------------------|------------------------|--------------------------------|-----------------------------------------------------------|
| Diffraction source                                         | EMBL-DESY P13          | SLS-PSI PXI                    | EMBL-DESY P13                                             |
| Wavelength (Å)                                             | 0.9763                 | 0.9999                         | 0.9763                                                    |
| Temperature (K)                                            | 100                    | 100                            | 100                                                       |
| Detector                                                   | DECTRIS EIGER 16M      | DECTRIS EIGER 16M              | DECTRIS EIGER 4M                                          |
| Crystal-detector distance (mm)                             | 160.248                | 201.035                        | 144.365                                                   |
| Rotation range per image (°)                               | 0.1                    | 0.1                            | 0.1                                                       |
| Total rotation range (°)                                   | 360                    | 270                            | 360                                                       |
| Exposure time per image (s)                                | 0.008                  | 0.00125                        | 0.008                                                     |
| Space group                                                | P2 (number 3)          | P2 <sub>1</sub> (number 4)     | P2 <sub>1</sub> 2 <sub>1</sub> 2 <sub>1</sub> (number 19) |
| <i>a</i> , <i>b</i> , <i>c</i> (Å)                         | 40.9, 88.4, 57.4       | 68.23, 36.55, 84.92            | 41.75, 94.37, 200.01                                      |
| $\alpha$ , $\beta$ , $\gamma$ (°)                          | 90.0, 94.8, 90.0       | 90.0, 109.63, 90.0             | 90.0, 90.0, 90.0                                          |
| Mosaicity (°)                                              | 0.072                  | 0.088                          | N.A.                                                      |
| Resolution range (Å)                                       | 48.06-1.30 (1.38-1.30) | 43.47-1.45 (1.54-1.45)         | 42.67-2.70 (2.83-2.70)                                    |
| Total No. of reflections                                   | 670292 (107088)        | 353325 (50285)                 | 149653 (20270)                                            |
| No. of unique reflections                                  | 95153 (14882)          | 69188 (10693)                  | 22626 (2943)                                              |
| Completeness (%)                                           | 95.4 (92.5)            | 97.9 (94.2)                    | 99.9 (99.9)                                               |
| Redundancy                                                 | 7.0 (7.2)              | 5.1 (4.7)                      | 6.6 (6.9)                                                 |
| $\langle I/\sigma(I) \rangle$                              | 7.7 (0.6)              | 8.9 (0.6)                      | 9.5 (2.2)                                                 |
| <i>R</i> <sub>meas</sub>                                   | 0.124 (2.845)          | 0.123 (2.233)                  | 0.160 (0.912)                                             |
| Overall <i>B</i> factor from Wilson plot (Å <sup>2</sup> ) | 24.9                   | 15.3                           | 45.6                                                      |
