# Supplementary material for: Cost-Effective Protein Production in CHO Cells Following Polyethylenimine-Mediated Gene Delivery Showcased by the Production and Crystallization of Antibody Fabs
Source: MDPI journal article supplement (doi:10.3390/antib12030051), 2023-08-04
Supplement: s1 [file s1]

**Supplementary Table S4** Comparison of cost for ExpiFectamine and PEI gene delivery for TGE in CHO cells

| Method of gene delivery            | Cost per 25 ml culture (EUR) | Minimal initial investment (EUR) | Transfected volume (l)* | Note                                          |
|------------------------------------|------------------------------|----------------------------------|-------------------------|-----------------------------------------------|
| ExpiFectamine CHO Transfection Kit | 36                           | 1430                             | 1                       | ThermoFisher Scientific, USA, Cat. No. A29129 |
| PEI method (this work)             | 2.5                          | 869                              | 4.4#                    |                                               |
| PEI                                | 0.5                          | 209                              | 12.5                    | Polysciences, USA, Cat. No. 23966-100         |
| feed                               | 2                            | 660                              | 4.4                     | this work                                     |

\* calculated for the amount of material corresponding to the minimal investment

# limiting factor is the amount of CHO CD Efficient Feed A (see Materials and Methods)
