# Supplementary material for: Cost-Effective Protein Production in CHO Cells Following Polyethylenimine-Mediated Gene Delivery Showcased by the Production and Crystallization of Antibody Fabs
Source: MDPI journal article supplement (doi:10.3390/antib12030051), 2023-08-04
Supplement: s1 [file s1]

**Supplementary Table S1** pCMV-3UTR cloning site enzymes and alternative cloning possibilities

| pCMV-3UTR<br>cloning site<br>enzyme                 | Isoschizomers                 | Compatible sticky ends*                                                                                                                                        | Recognition<br>sequences                                                                                                                                                                                                                                                                                                               |
|-----------------------------------------------------|-------------------------------|----------------------------------------------------------------------------------------------------------------------------------------------------------------|----------------------------------------------------------------------------------------------------------------------------------------------------------------------------------------------------------------------------------------------------------------------------------------------------------------------------------------|
| AgeI<br>5' ...A●CCGG T...3'<br>3' ...T GGCC●A...5'  | AsiGI, BshTI,<br>CspAI, PinAI | AccIII, Aor13HI, BseAI, Bsp13I, BspEI,<br>Kpn2I, MroI<br>Cfr9I, TspMI, XmaI, XmaCI<br>MroNI, NgoMIV<br>BsaWI<br>Bse118I, BsrFI, BssAI, Cfr10I<br>MreI<br>SgrAI | 5' ...T●CCGG A...3'<br>3' ...A GGCC●T...5'<br>5' ...C●CCGG G...3'<br>3' ...G GGCC●C...5'<br>5' ...G●CCGG C...3'<br>3' ...C GGCC●G...5'<br>5' ...W●CCGG W...3'<br>3' ...W GGCC●W...5'<br>5' ...R●CCGG Y...3'<br>3' ...Y GGCC●R...5'<br>5' ...CG●CCGG CG...3'<br>3' ...GC GGCC●GC...5'<br>5' ...CR●CCGG YG...3'<br>3' ...GY GGCC●RC...5' |
| SpeI<br>5' ...A●CTAG T...3'<br>3' ...T GATC●A...5'  | AhlI, BcuI                    | AspA2I, AvrII, BlnI, XmaJI<br>AsuNHI, NheI<br>XbaI                                                                                                             | 5' ...C●CTAG G...3'<br>3' ...G GATC●C...5'<br>5' ...G●CTAG C...3'<br>3' ...C GATC●G...5'<br>5' ...T●CTAG A...3'<br>3' ...A GATC●T...5'                                                                                                                                                                                                 |
| EcoRI<br>5' ...G●AATT C...3'<br>3' ...C TTAA●G...5' |                               | MluCI, Sse9I, TasI, Tsp509I, TspEI<br>MfeI, MunI<br>AcsI, ApoI, XapI                                                                                           | 5' ...●AATT ...3'<br>3' ... TTAA●...5'<br>5' ...C●AATT G...3'<br>3' ...G TTAA●C...5'<br>5' ...R●AATT Y...3'<br>3' ...Y TTAA●R...5'                                                                                                                                                                                                     |
| XhoI<br>5' ...C●TCGA G...3'<br>3' ...G AGCT●C...5'  | PaeR7I,<br>Sfr274I, SlaI      | Ama87I, AvaI, BmeT110I, BsiHKCI,<br>BsoBI, Eco88I, SmlI, SmoI<br>SalI<br>SgrDI<br>AbsI<br>PspXI                                                                | 5' ...C●TCGA G...3'<br>3' ...G AGCT●C...5'<br>5' ...G●TCGA C...3'<br>3' ...C AGCT●G...5'<br>5' ...CG●TCGA CG...3'<br>3' ...GC AGCT●GC...5'<br>5' ...CC●TCGA GG...3'<br>3' ...GG AGCT●CC...5'<br>5' ...VC●TCGA GB...3'<br>3' ...BG AGCT●CV...5'                                                                                         |

\* from the SnapGene Viewer v7.0.1 (SnapGene software ([www.snapgene.com](http://www.snapgene.com))) enzyme database

B = C or G or T

R = A or G

V = A or C or G

W = A or T

Y = C or T
